# Supplementary material for: MTBVAC vaccination protects rhesus macaques against aerosol challenge with M. tuberculosis and induces immune signatures analogous to those observed in clinical studies
Source: PubMed Central journal article supplement (PMC7782851; doi:10.1038/s41541-020-00262-8), 2021-01-04
Supplement: 41541_2020_262_MOESM1_ESM.pdf [file 41541_2020_262_MOESM1_ESM.pdf]

### Supplementary Table 1

Average number of acid fast bacilli per granuloma of each developmental stage in lung and hilar lymph node counted in Ziehl-Neelsen stained tissue sections.

---

| Group      | Mean number of acid fast bacilli per granuloma |         |          |         |        |         |
|------------|------------------------------------------------|---------|----------|---------|--------|---------|
|            | Granuloma stage                                |         |          |         |        |         |
|            | Type I                                         | Type II | Type III | Type IV | Type V | Type VI |
| BCG        | 0                                              | 0       | 0        | 0       | 0.106  | 8.167   |
| MTBVAC     | 0                                              | 0       | 0        | 0       | 0      | 2.214   |
| No vaccine | 0                                              | 0       | 0        | 0.009   | 0.400  | 16.577  |

---

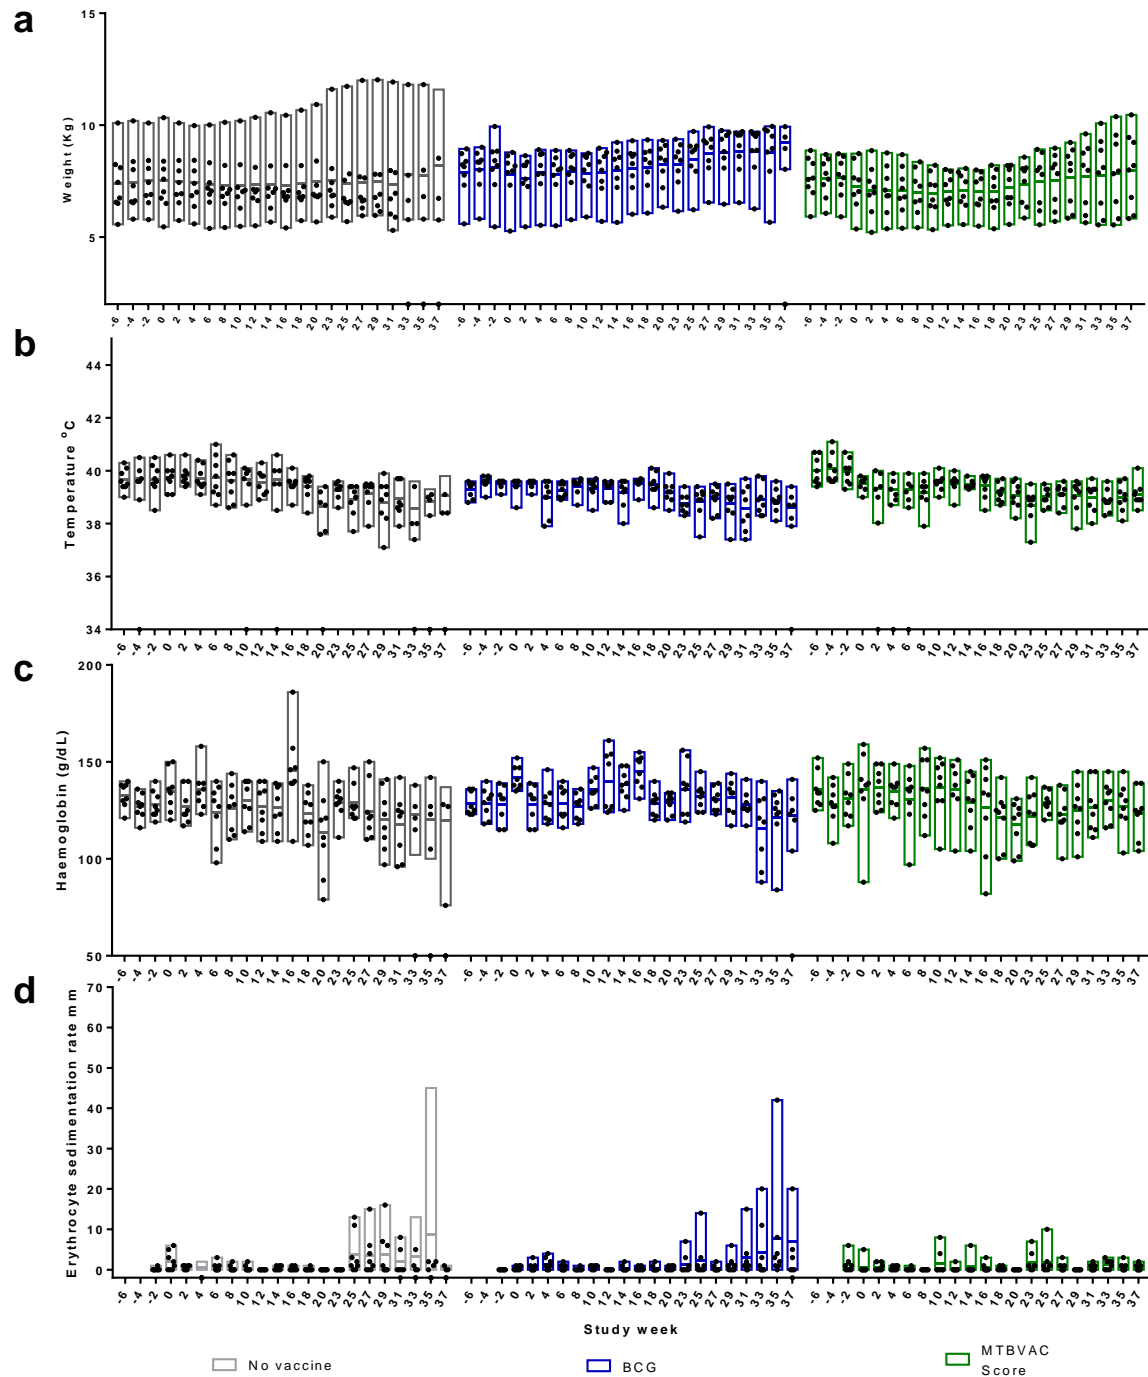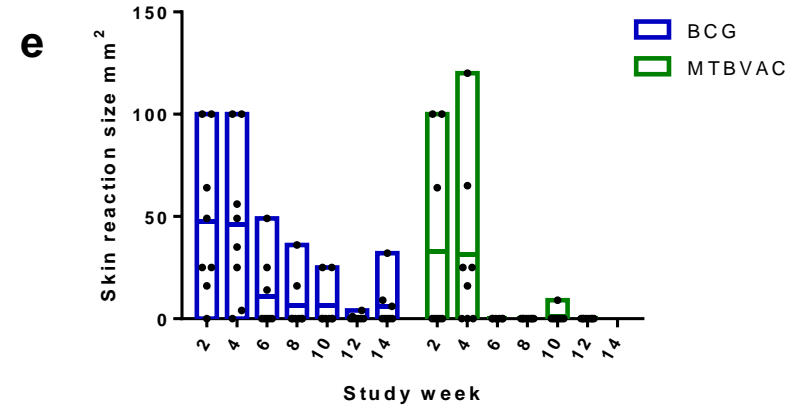

**Supplementary Figure 1: Clinical parameters measured throughout the vaccination and challenge phases of the study. A: body weight; B body temperature; C: red blood cell haemoglobin concentration; D: erythrocyte sedimentation rate; E: skin reaction size at vaccination site. Box plots show the mean result for the vaccination group with minimum and maximum values, symbols represent data measured from individual subjects.**

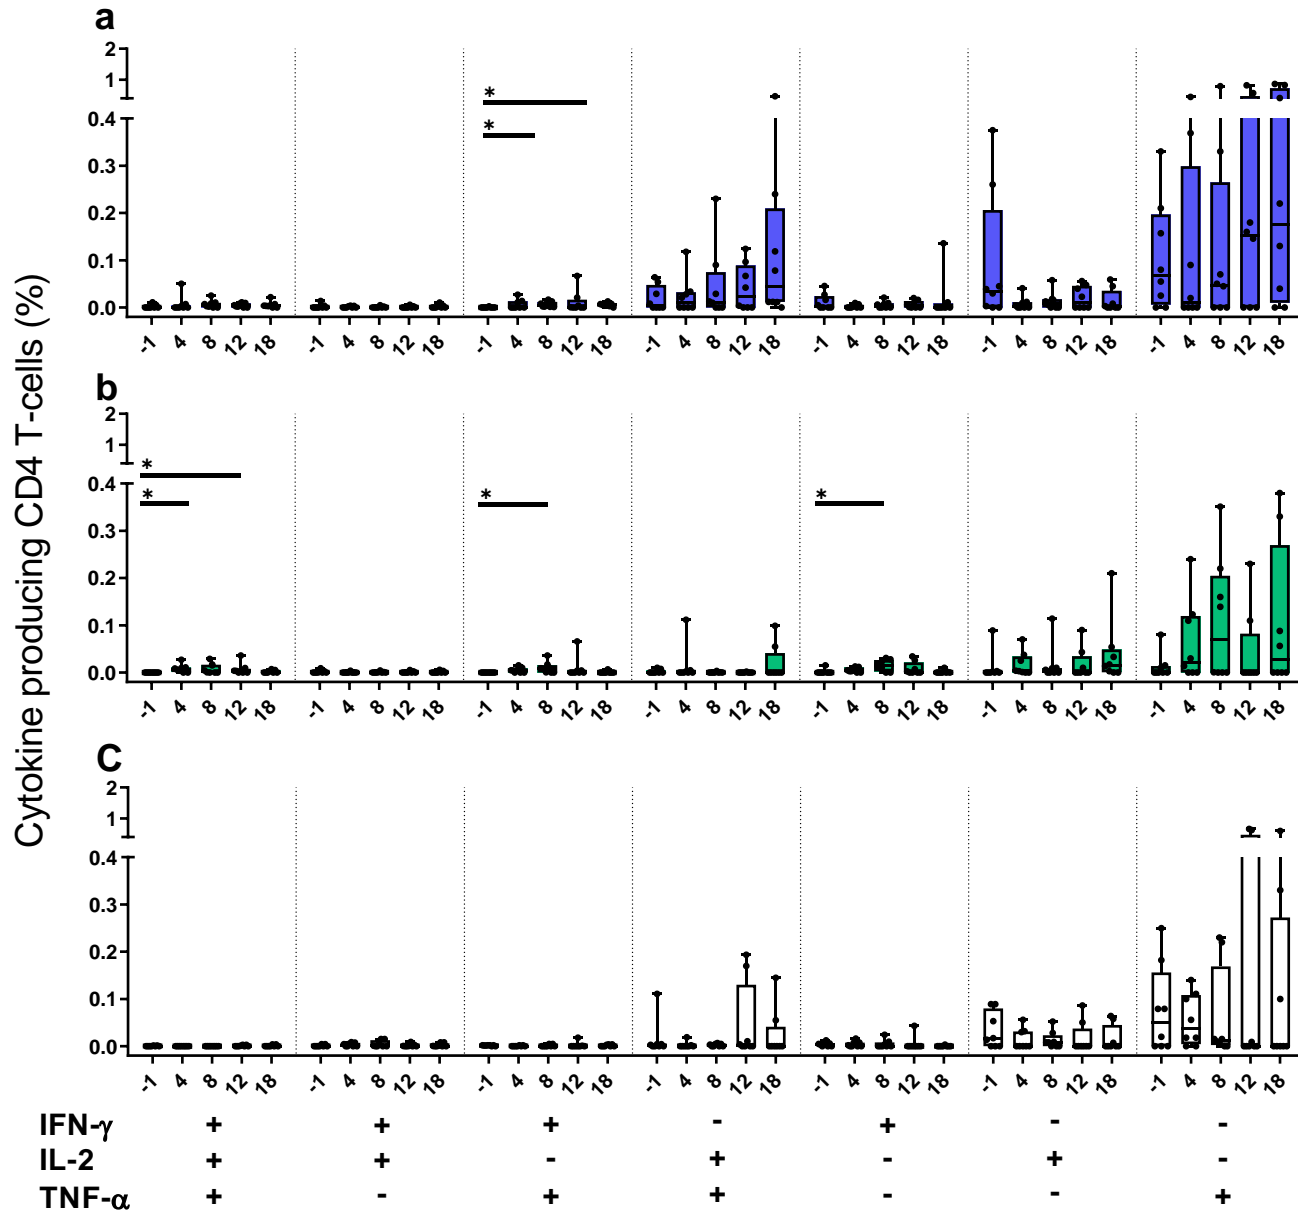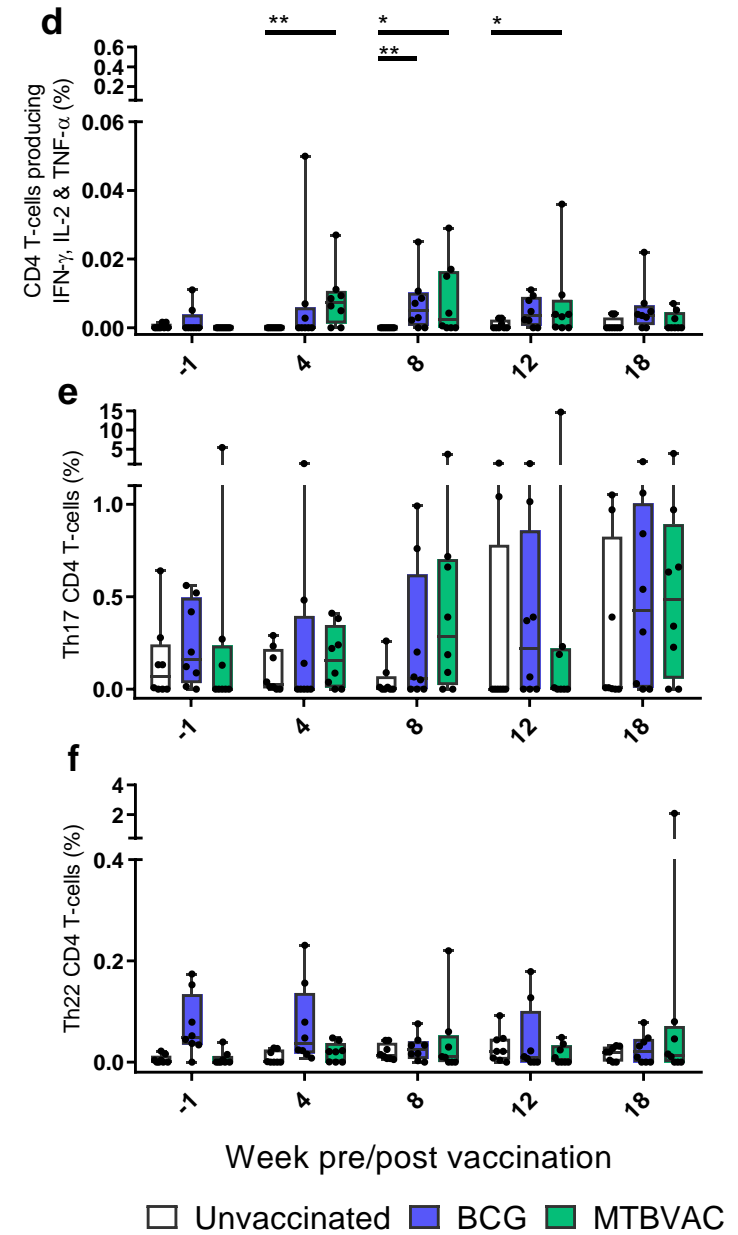

**Supplementary Figure 2. MTBVAC-specific CD4 T-cell cytokine secretion profiles measured by whole blood intracellular cytokine staining.** Box plots show the vaccination group median frequency of CD4 T-cells producing combinations of the cytokines IFN- $\gamma$ , IL-2 and TNF- $\alpha$  (A, B, C, D); IL-17 (E) or IL-22 (F) +/- IQR with minimum and maximum values indicated by box whiskers. Cytokine production was measured at specific weeks prior to (-1) and following (4, 8, 12 and 18) BCG or MTBVAC vaccination. Significant differences between pre- and post-vaccination values (Wilcoxon signed-rank) and between groups (Mann-Whitney U-test) are indicated by bars and asterisks: \*  $p \leq 0.05$ , \*\*  $p \leq 0.01$ , \*\*\*  $p \leq 0.001$  (all p-values are unadjusted for multiple comparisons). Frequencies measured in individual animals are represented by dots.

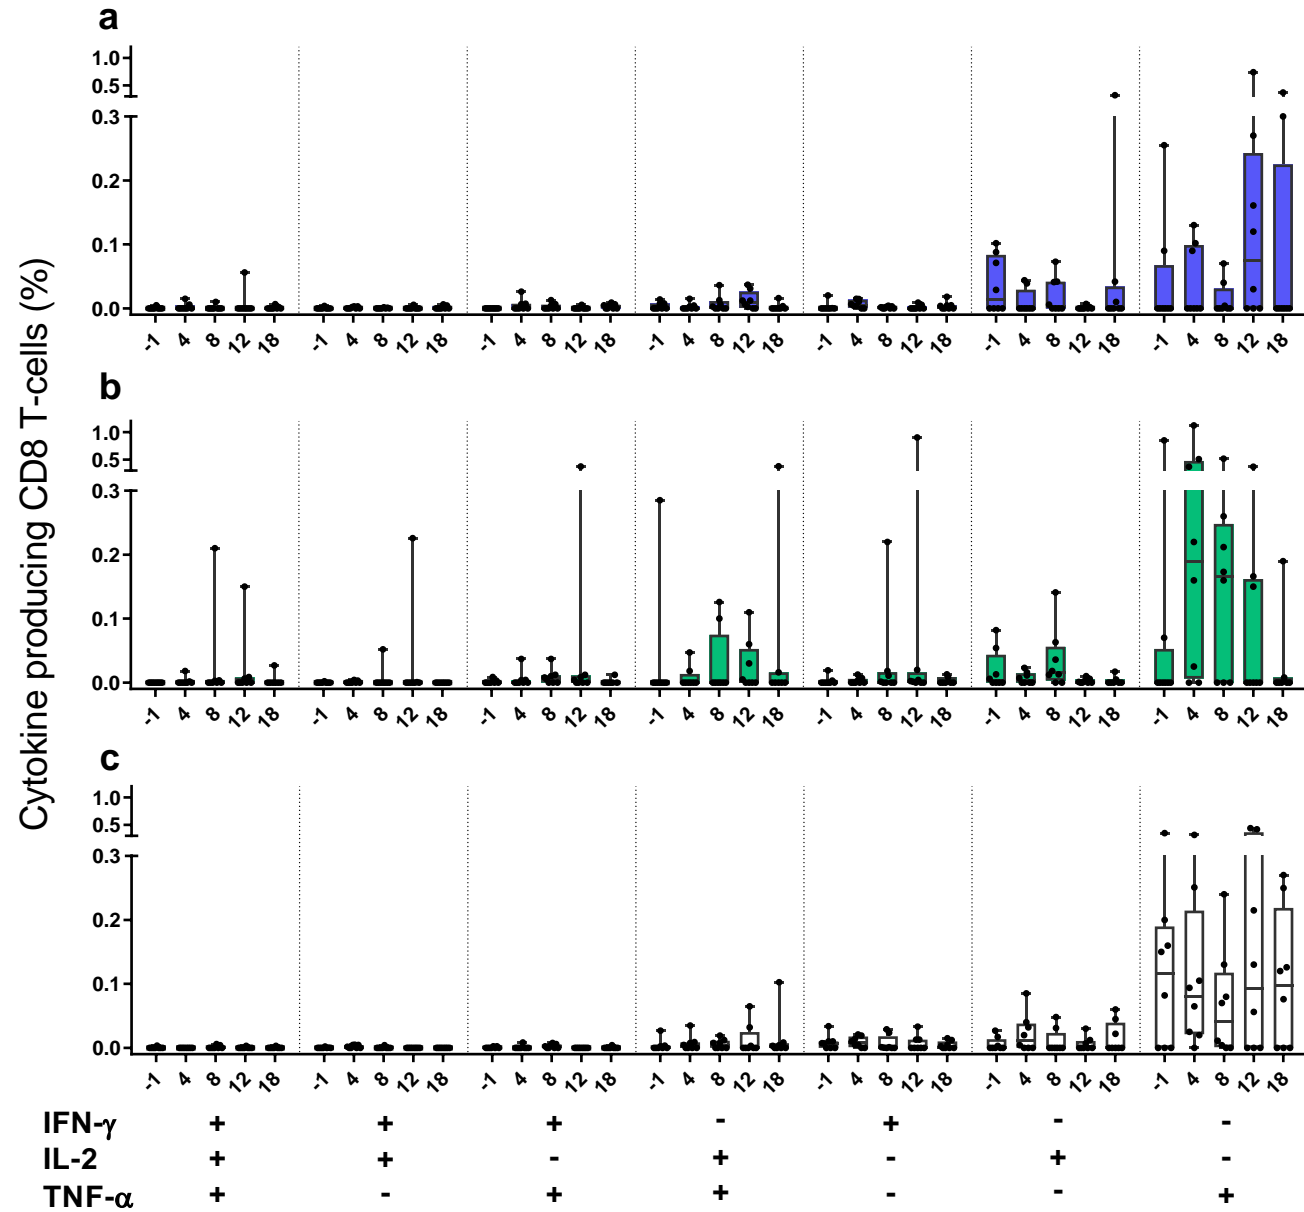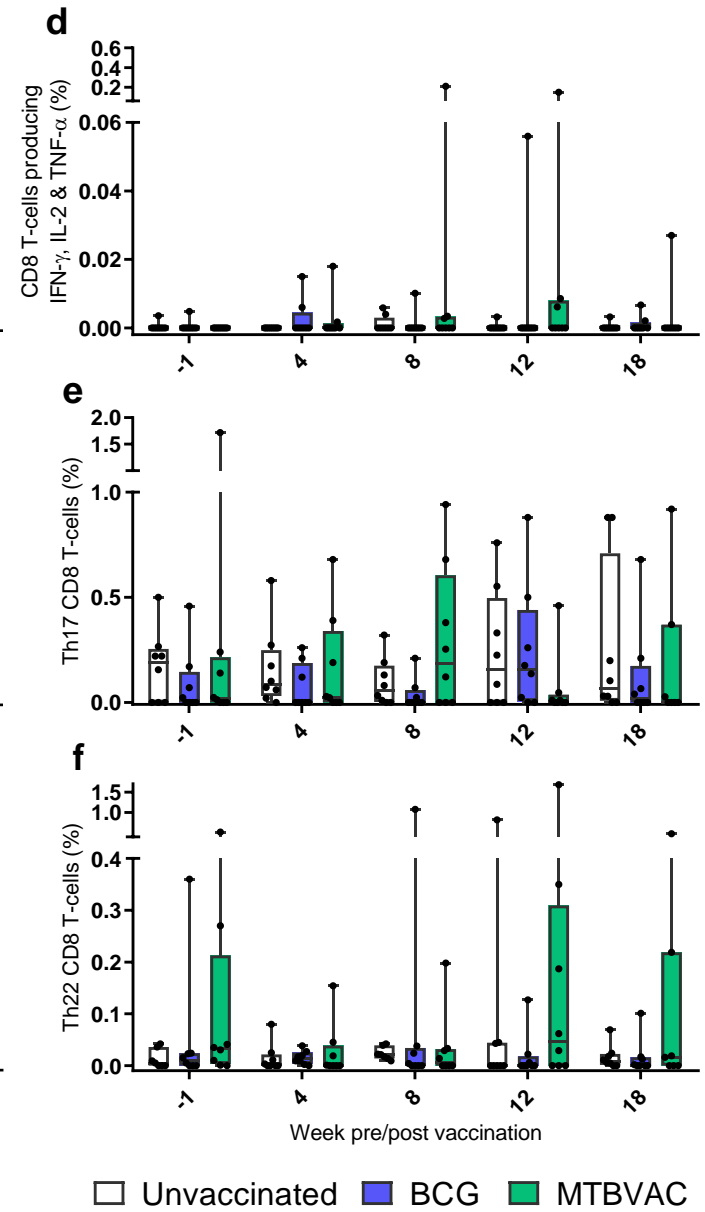

**Supplementary Figure 3. *M. tuberculosis* peptide-specific CD8 T-cell cytokine secretion profiles measured by whole blood intracellular cytokine staining.** Box plots show the vaccination group median frequency of CD4 T-cells producing combinations of the cytokines IFN- $\gamma$ , IL-2 and TNF- $\alpha$  (A, B, C, D); IL-17 (E) or IL-22 (F) +/- IQR with minimum and maximum values indicated by box whiskers. Cytokine production was measured at specific weeks prior to (-1) and following (4, 8, 12 and 18) BCG or MTBVAC vaccination. Frequencies measured in individual animals are represented by dots.

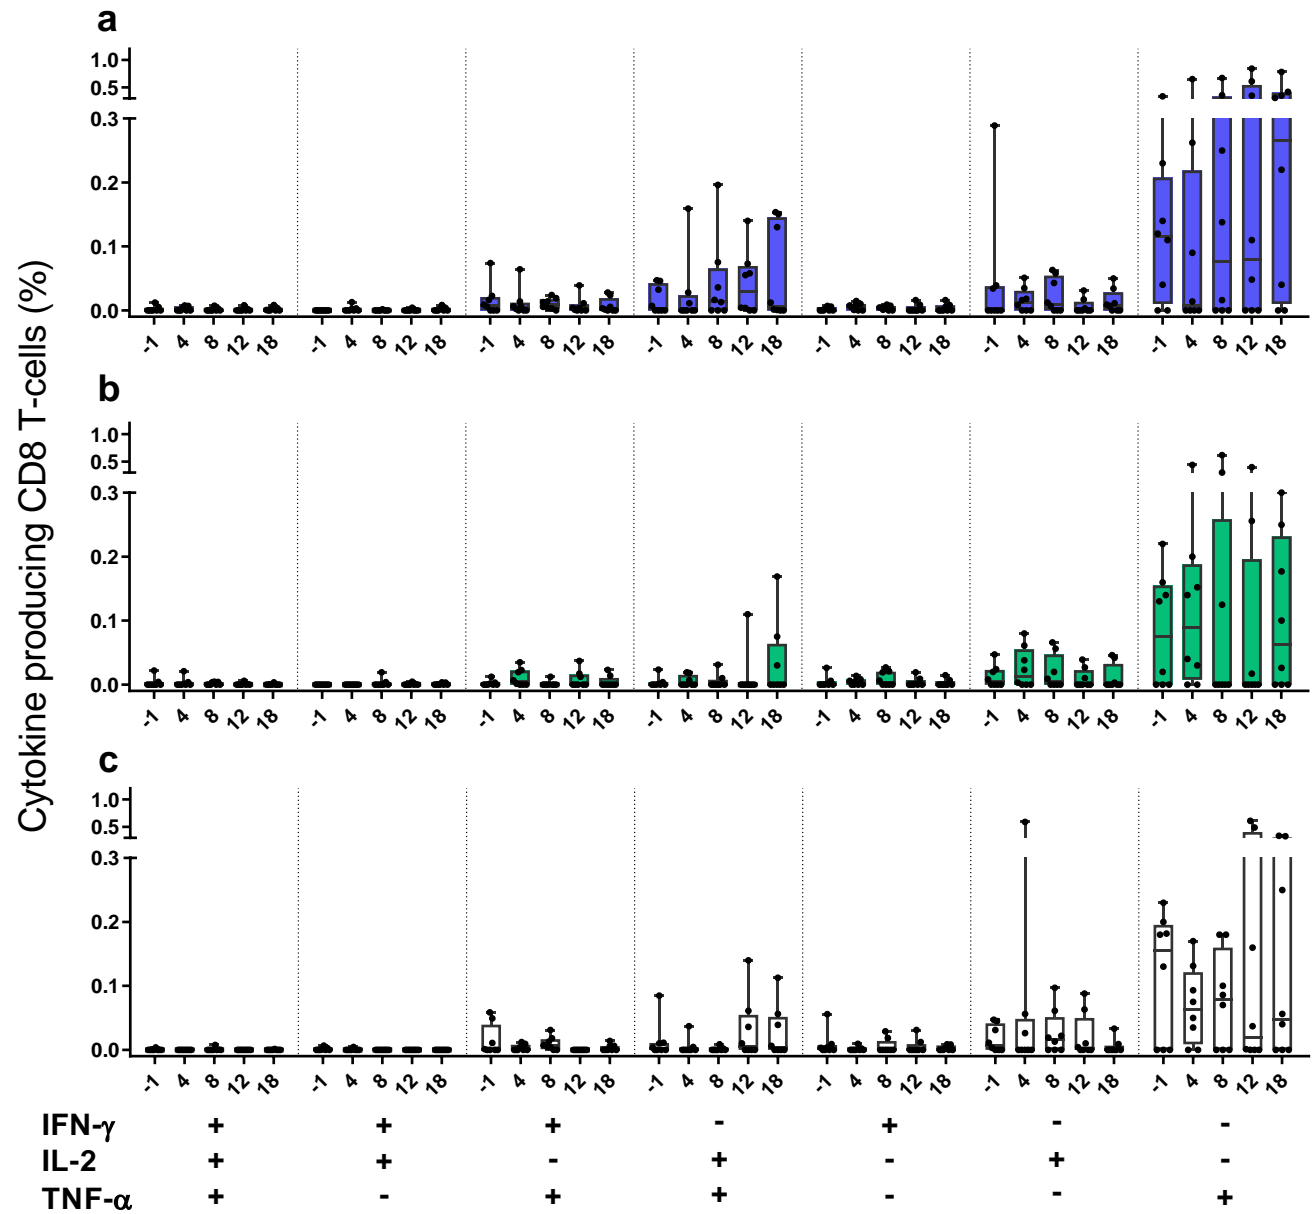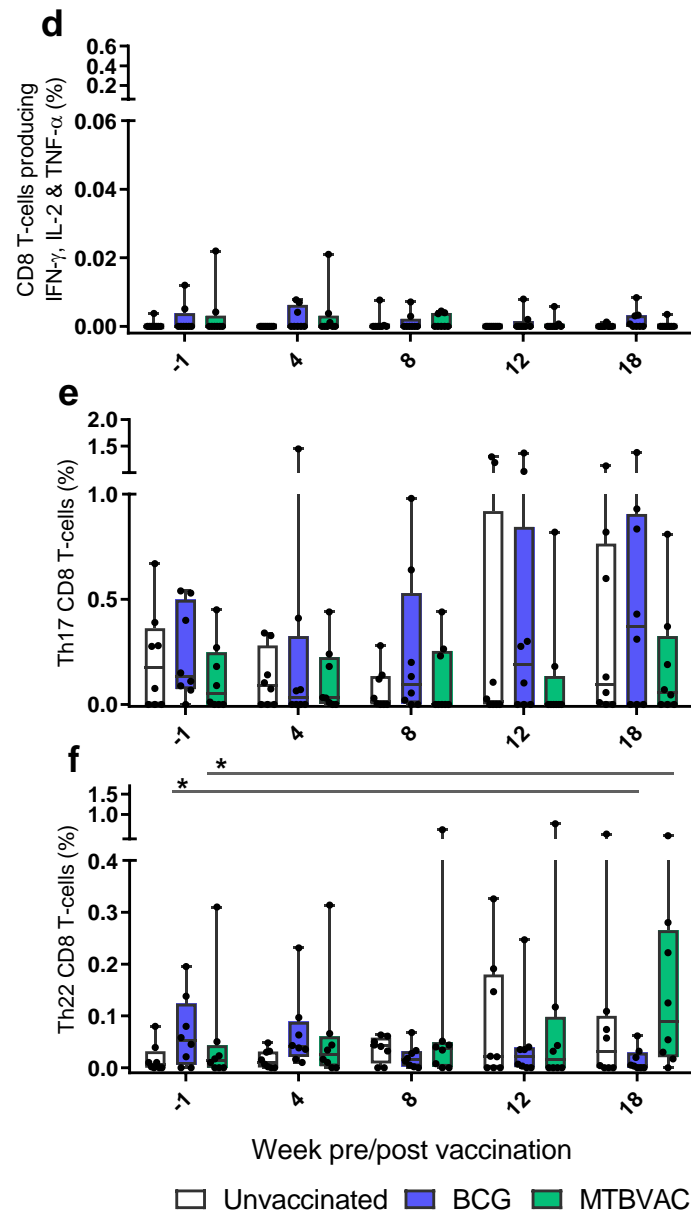

**Supplementary Figure 4. MTBVAC-specific CD8 T-cell cytokine secretion profiles measured by whole blood intracellular cytokine staining.** Box plots show the vaccination group median frequency of CD4 T-cells producing combinations of the cytokines IFN- $\gamma$ , IL-2 and TNF- $\alpha$  (A, B, C, D); IL-17 (E) or IL-22 (F) +/- IQR with minimum and maximum values indicated by box whiskers. Cytokine production was measured at specific weeks prior to (-1) and following (4, 8, 12 and 18) BCG or MTBVAC vaccination. Significant differences between pre- and post-vaccination values (Wilcoxon signed-rank) are indicated by bars and asterisks: \*  $p \leq 0.05$ . Frequencies measured in individual animals are represented by dots.



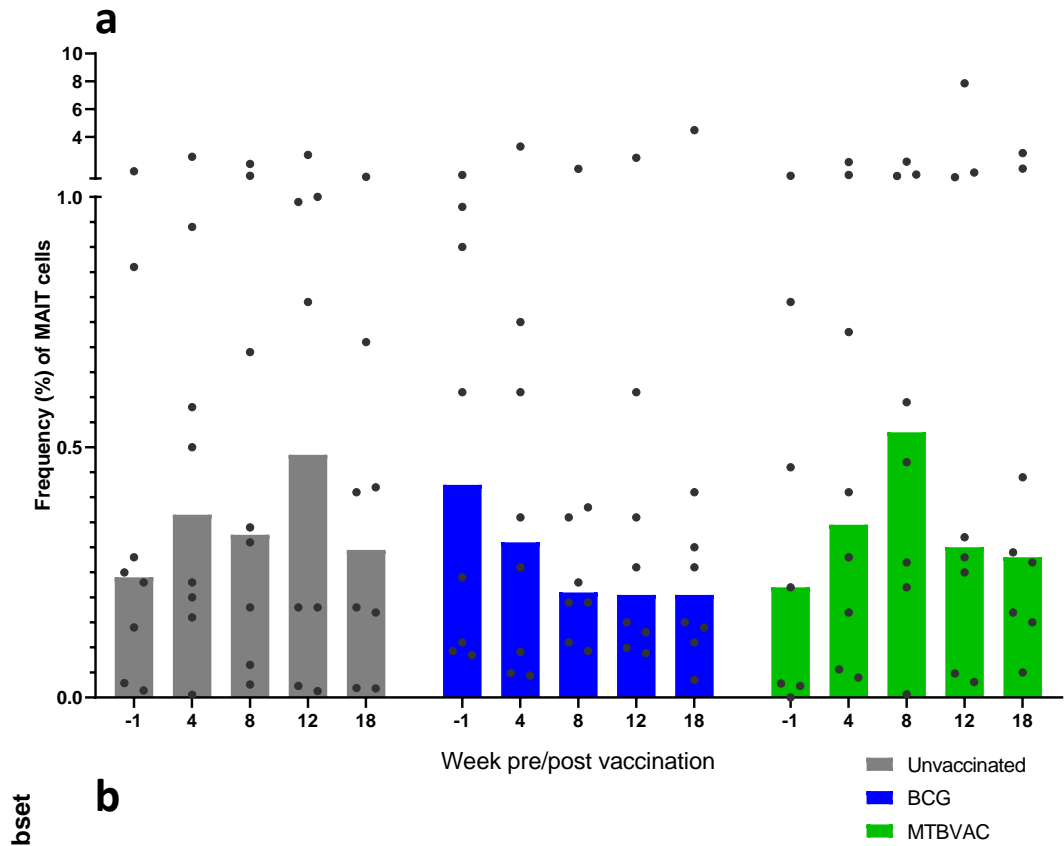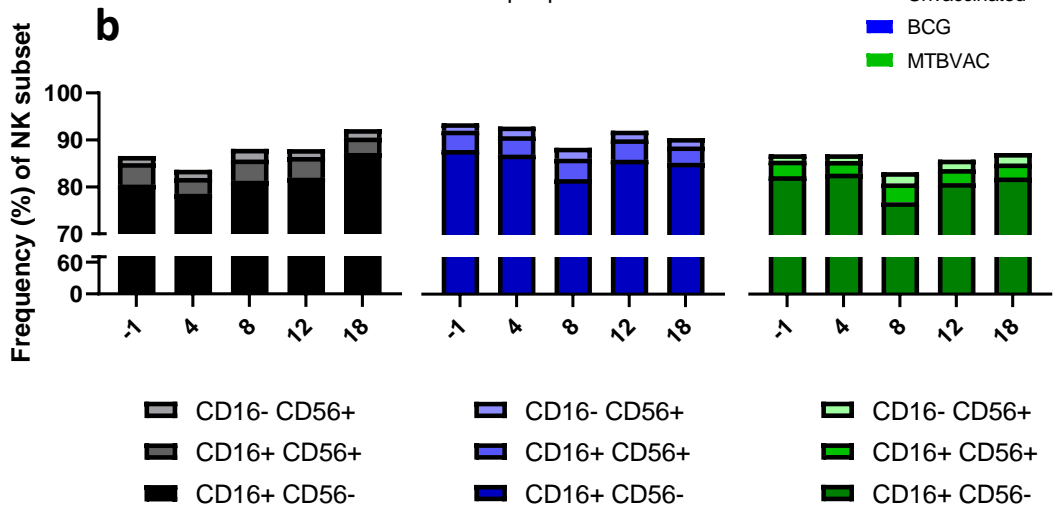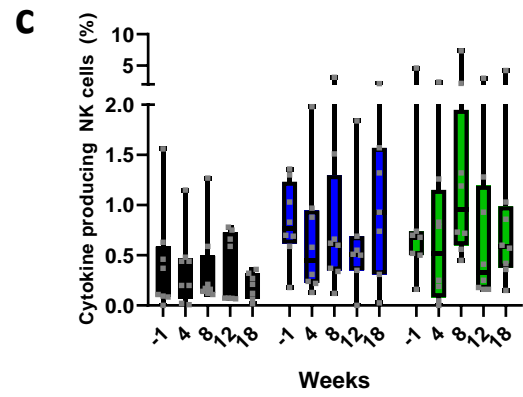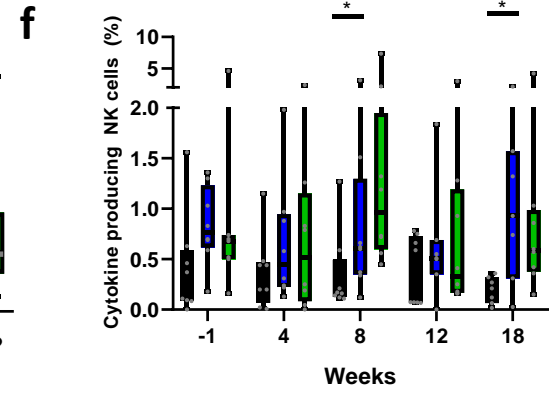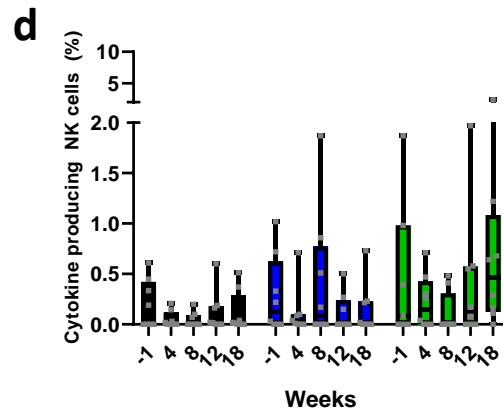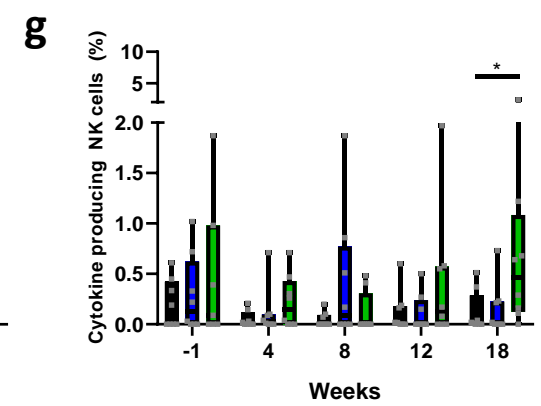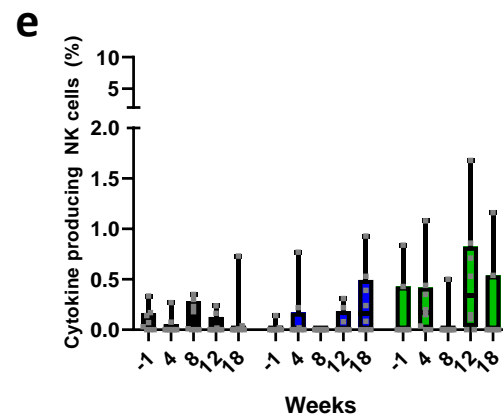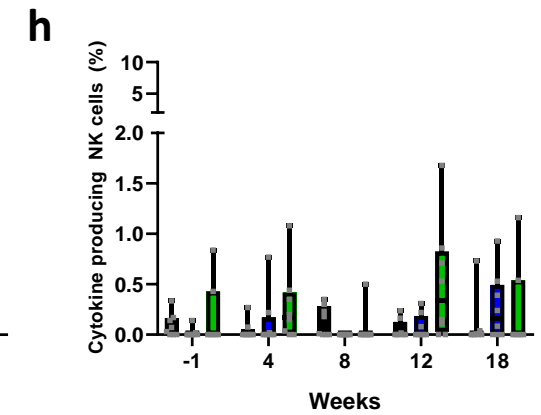

**Supplementary figure 5. Frequency of innate lymphoid cell populations.** The frequency of mucosal associated invariant T-cells (MAIT) (A) and Natural Killer cell (B) populations were measured by WB ICS assay prior to (-1) and at weeks four, eight, 12, and 18 after BCG or MTBVAC vaccination. Figure a) bar charts show the vaccination group median percentage of MAIT cells as a proportion of the CD3+ T-cell population, frequencies measured in individual animals are shown as dots. Figure B) stacked bars show the group median percentages of each NK subset as a proportion of the CD3-, CD8+ lymphocyte population. Figures C – H) frequency of NK cells producing IFN- $\gamma$ , IL-2, TNF- $\alpha$ , IL-17 or IL-22 in response to stimulation with *M. tuberculosis* peptides (E, H) or MTBVAC (D, G) or without antigen or peptide stimulation (C, F). Note that plots C-E show the kinetics of NK cell cytokine production in each vaccination group, whereas plots F-H show the same data aligned by time for comparative purposes. Cytokine production was measured at specific weeks prior to (-1) and following (4, 8, 12 and 18) BCG or MTBVAC vaccination. Box plots show the vaccination group median +/- IQR with minimum and maximum values indicated by box whiskers. Frequencies measured in individual animals are represented by dots. Significant differences between vaccination groups are indicated by bars with asterisks \*  $p \leq 0.05$ , \*\*  $p \leq 0.01$  (all p-values are unadjusted for multiple comparisons).

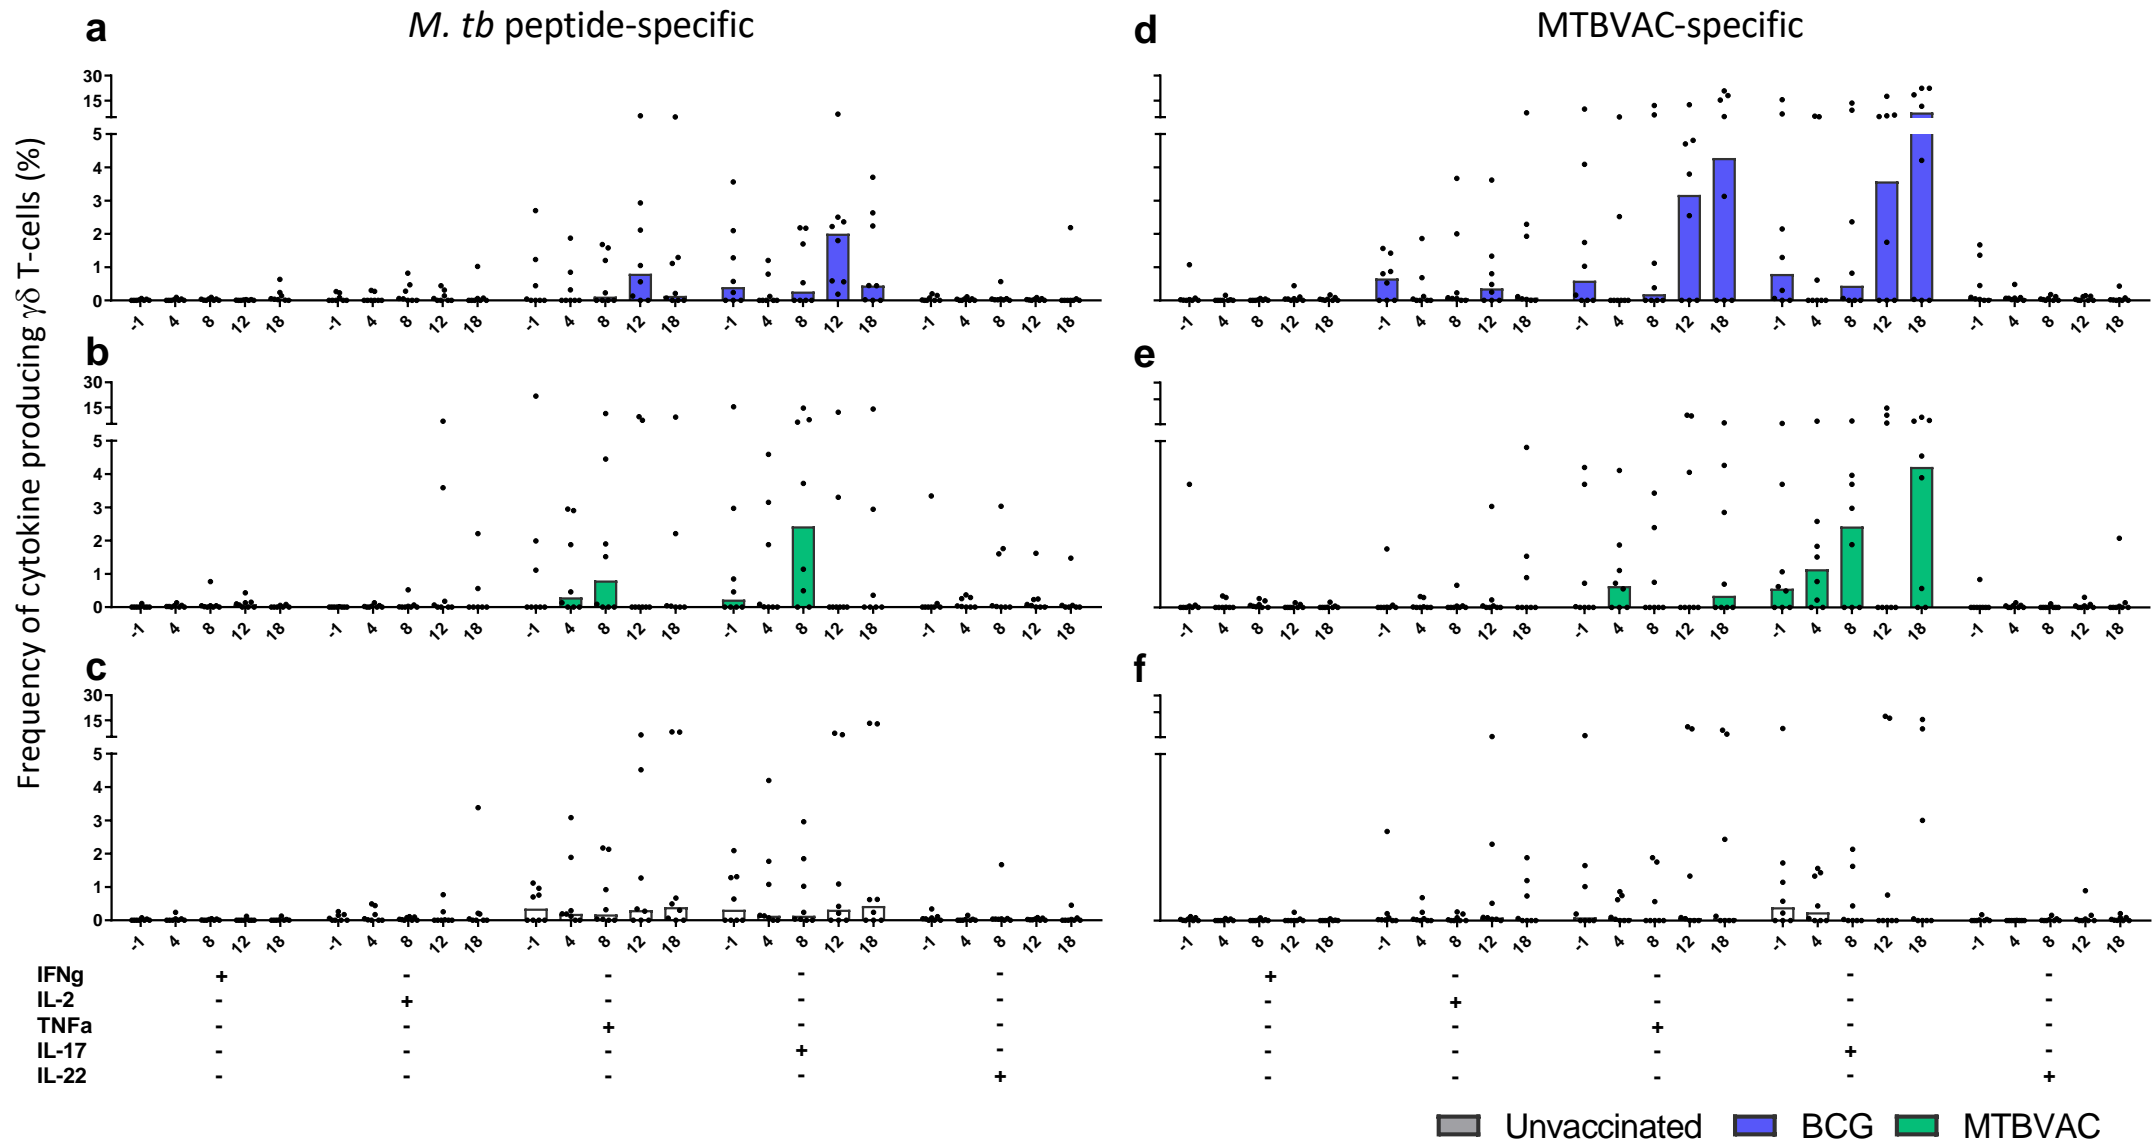

**Supplementary Figure 6. Cytokine production from  $\gamma\delta$  T-cells.** Bars show the vaccination group median frequency of  $\gamma\delta$  T-cells producing IFN- $\gamma$ , IL-2, TNF- $\alpha$ , IL-17 or IL-22 in response to stimulation with *M. tuberculosis* peptides (A, B, C) or MTBVAC (D, E, F). Cytokine production was measured at specific weeks prior to (-1) and following (4, 8, 12 and 18) BCG or MTBVAC vaccination. Frequencies measured in individual animals are represented by dots. Y-axis scales are identical in all plots.

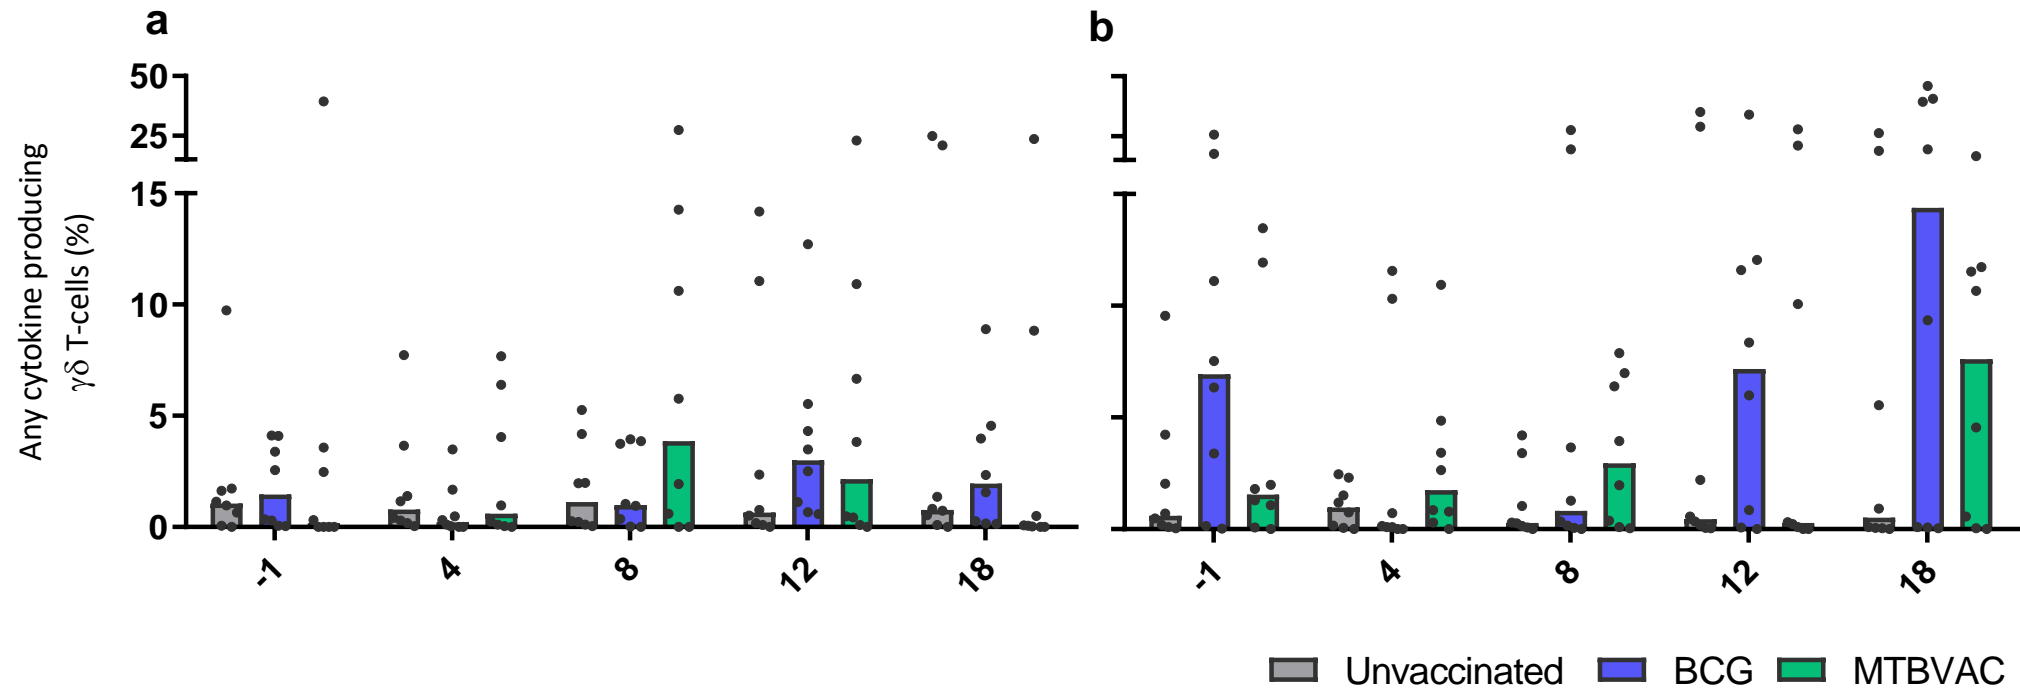

**Supplementary Figure 7. Cytokine production from  $\gamma\delta$  T-cells (summed).** Bars show the vaccination group median summed frequency of  $\gamma\delta$  T-cells producing IFN- $\gamma$ , IL-2, TNF- $\alpha$ , IL-17 or IL-22 in response to stimulation with *M. tuberculosis* peptides (A) or MTBVAC (B). Cytokine production was measured at specific weeks prior to (-1) and following (4, 8, 12 and 18) BCG or MTBVAC vaccination. Frequencies measured in individual animals are represented by dots. Y-axis scales are identical in all plots.

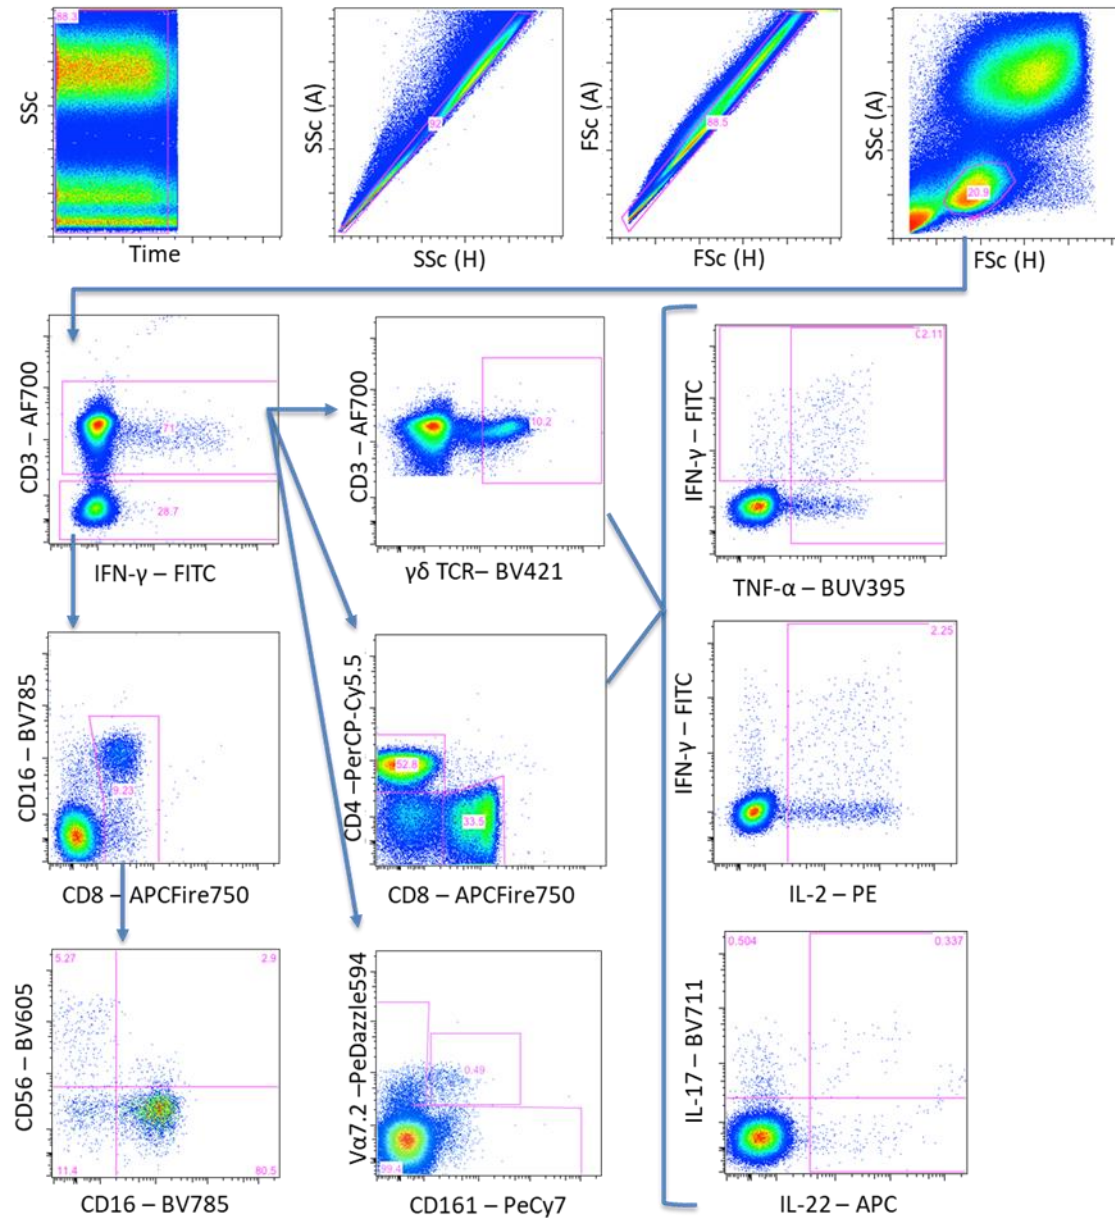

**Supplementary Figure 8. Flow cytometric gating strategy.** Sequential gating used for cell population analysis described in manuscript figure 4 and supplementary figures 3 – 8.
